# Supplementary material for: Retinal Ganglion Cell Survival and Axon Regeneration after Optic Nerve Transection is Driven by Cellular Intravitreal Sciatic Nerve Grafts
Source: PubMed Central journal article supplement (PMC7349876; doi:10.3390/cells9061335), 2020-05-27
Supplement: cells-09-01335-s001.pdf [file cells-09-01335-s001.pdf]

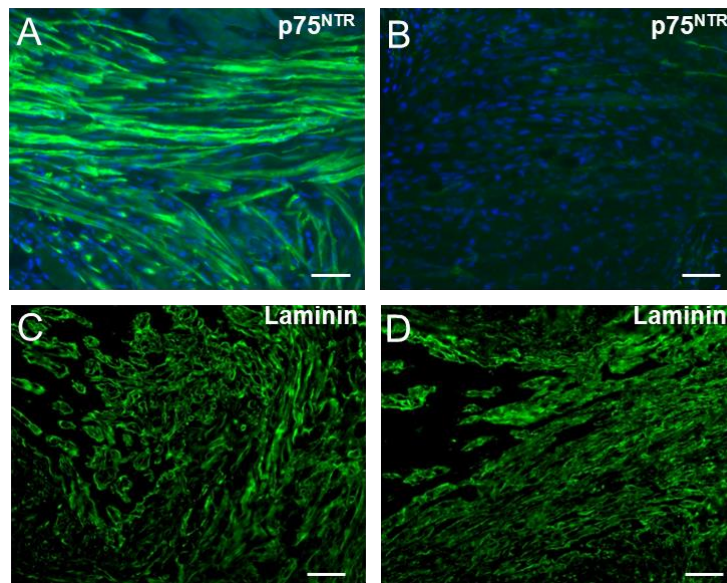

**Figure S1.** Schwann cells are absent from SN after freeze-thawing but basal lamina tubes remain intact. (A) p75<sup>NTR+</sup> (green) with DAPI nuclear stain (blue) was used as a marker to detect Schwann cells (green) in fresh CSN, but not in freeze-thawed ASN grafts. (B) Laminin<sup>+</sup> basal lamina tubes (green) were present in both (C) CSN and (D) ASN grafts. Scale bars for A–D = 50 μm.

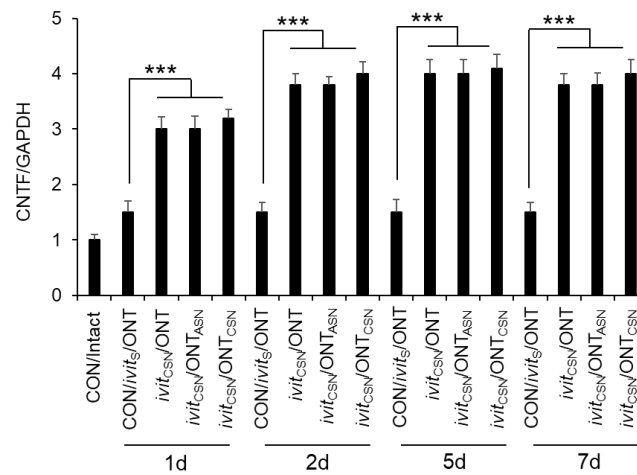

**Figure S2.** Relative mRNA levels of ciliary neurotrophic factor (CNTF) at different time points after grafting. \*\*\* $P < 0.0001$ , ANOVA with Dunnett's *post hoc* test. GAPDH, Glyceraldehyde-3-phosphate dehydrogenase (housekeeping gene).

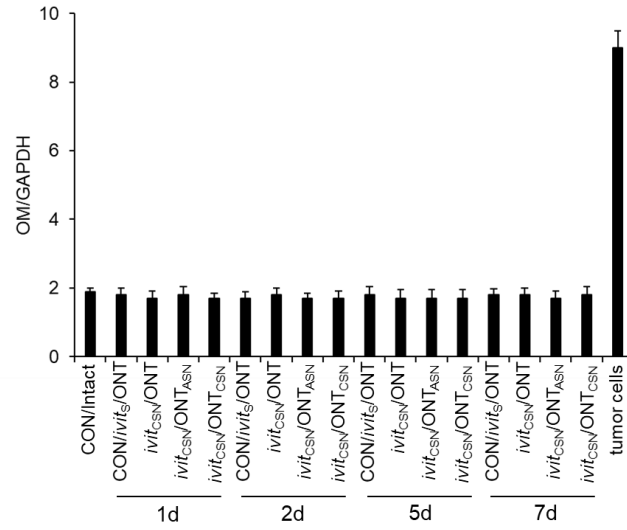

**Figure S3.** Relative levels of oncomodulin (OM) mRNA at different time-points after grafting. Tumor cells are used as a positive control. No significant difference in oncomodulin levels between experimental groups. GAPDH, Glyceraldehyde-3-phosphate dehydrogenase (housekeeping gene).
